# Supplementary material
Source: HighWire-hosted journal article supplement (https://molpharm.aspetjournals.org/highwire/filestream/86933/field_highwire_adjunct_files/0/269_Supp_file.pdf)
Supplement: 269_Supp_file.pdf [file 269_Supp_file.pdf]

Tacrine induces endoplasmic reticulum-stressed apoptosis via disrupting the proper assembly of oligomeric acetylcholinesterase in cultured neuronal cells

Etta Y.L. Liu<sup>1,4</sup>, Shinghung Mak<sup>3,4</sup>, Xiangpeng Kong<sup>2,3</sup>, Yingjie Xia<sup>3,4</sup>, Kenneth K.L. Kwan<sup>3,4</sup>, Miranda L. Xu<sup>3,4</sup>, Karl W.K. Tsim<sup>3,4\*</sup>

<sup>1</sup>Key Laboratory of Food Quality and Safety of Guangdong Province, College of Food Science, South China Agricultural University, Guangzhou 510642, China;

<sup>2</sup>Institute of Pharmaceutical & Food Engineering, Chinese Medicine Master Studio of Wang Shimin, Shanxi University of Chinese Medicine, 121 Daxue Road, Yuci District, Jinzhong 030619, China;

<sup>3</sup>Shenzhen Key Laboratory of Edible and Medicinal Bioresources, SRI, The Hong Kong University of Science and Technology Shenzhen, China;

<sup>4</sup>Division of Life Science and State Key Laboratory of Molecular Neuroscience, The Hong Kong University of Science and Technology, Hong Kong, China

This PDF file includes:

Supplementary Figure 1 to 3.

Supplemental Data File 1 to 2.

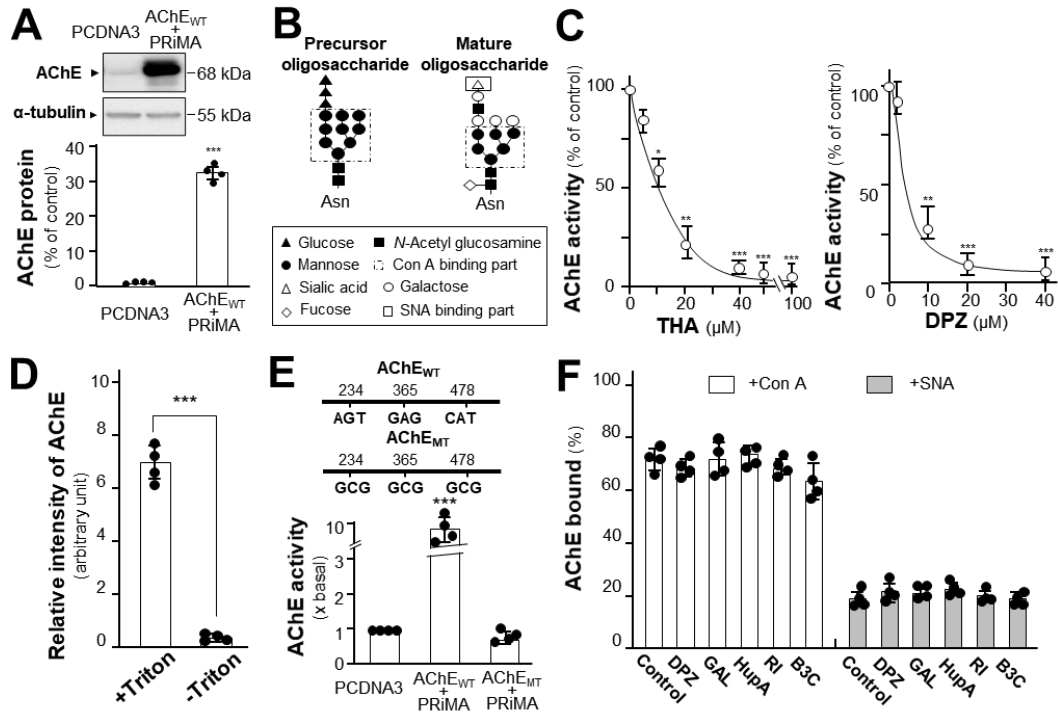

### Supplementary Figure 1.

(A) NG108-15 cells were transfected with pcDNA3 and AChE<sub>WT</sub> with PRiMA. Protein lysates of the cultures were performed for Western blot assay. (B) A schematic diagram of binding parts of Con A and SNA were shown. (C) Cultured NG108-15 cells were treated with or without tacrine (THA), or donepezil (DPZ), at different concentrations for 24 hours. Protein lysates of the cultures were performed Ellman assay. (D) Cultured NG108-15 cells co-transfected with AChE and PRiMA were exposed with thapsigargin (Tg, 1 μM) for 24 hours. Cells were immuno-stained by anti-AChE antibody with or without permeabilization of Triton X-100 (0.2%). The quantification of fluorescence intensity of AChE was shown. The values of average fluorescence intensity/cell were analyzed by ImageJ software. (E) The cDNAs encoded wild type AChE (AChE<sub>WT</sub>) and AChE activity-deleted mutant (AChE<sub>MT</sub>) were shown by diagram. AChE<sub>WT</sub> S234 (AGT), E365 (GAG), H478 (CAT) were mutated to A (GCG) (left panel). HEK293T cells were transfected with pcDNA3, AChE<sub>WT</sub> and AChE<sub>MT</sub> with PRiMA. Protein lysates of the cultures were performed Ellman assay (right panel). (F) AChEI-treated NG108-15 cell lysate was incubated with Con A,

SNA or agarose. The concentrations of AChEIs were shown as in Fig. 10B. Percentage of precipitated AChE was calculated. The data are normalized to the percentage of control, or the amount of agarose-precipitated AChE. Values are expressed as the percentage of control to basal reading, or the fold of basal value, and are in means  $\pm$  SD,  $n=4$ , each with triplicate samples. Statistical significance was analyzed by one-way repeated measures of ANOVA with subsequent application of Dunnett's multiple comparisons test. \* $P<0.5$ , \*\* $P<0.01$ , \*\*\* $P<0.001$  vs. control.

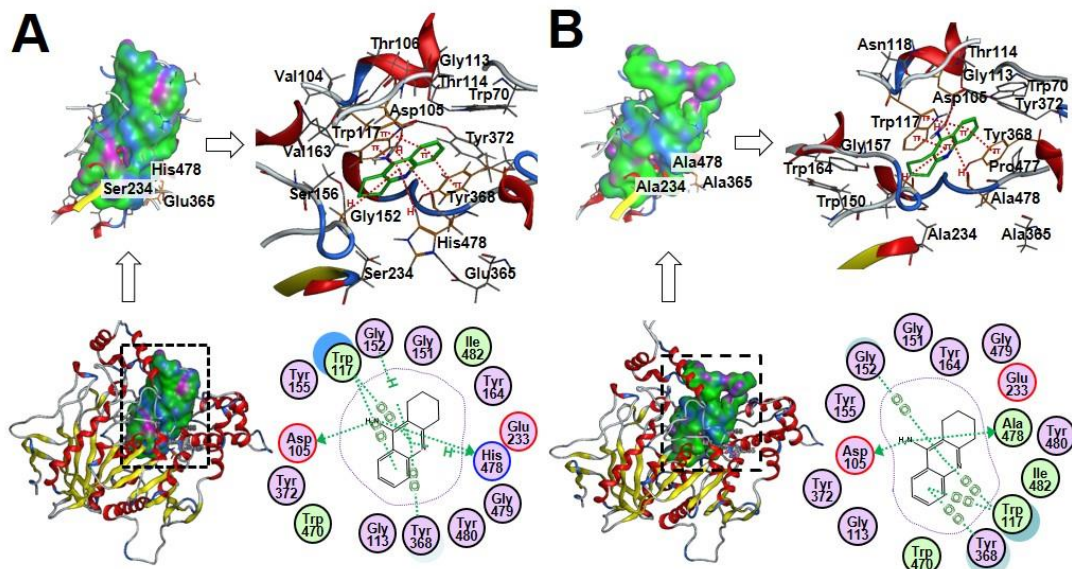

**Supplementary Figure 4. Proposed binding modes of tacrine with wild type and activity-deleted mutant AChE.** (A) Interactions of tacrine with AChE<sub>WT</sub> (ligand is shown as green) are shown as 3D and 2D images. (B) Interactions of tacrine with AChE<sub>MT</sub> (ligand is shown as green) are shown as 3D and 2D images. Key residues for binding of tacrine are shown. These binding modes show certain similarity to that of rivastigmine.

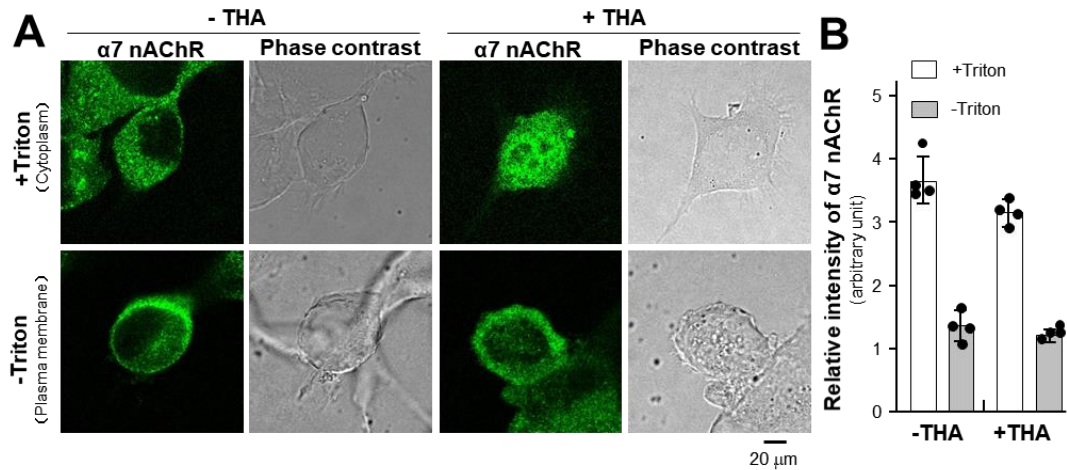

**Supplementary Figure 5. Taurine dose not block the trafficking of  $\alpha 7$  nAChR to membrane.**

(A) Cultured NG108-15 cells transfected with  $\alpha 7$  nAChR were exposed with or without taurine (THA; 20  $\mu$ M) for 24 hours. Cells were immuno-stained by the anti- $\alpha 7$  nAChR antibody with or without permeabilization of Triton X-100 (0.2%). Fluorescence and phase photos were taken. (B) The quantification of fluorescence intensity of  $\alpha 7$  nAChR was shown. The values of average fluorescence intensity/cell were analyzed by ImageJ software. Values are in means  $\pm$  SD,  $n=4$ .

Supplemental Data File 1. The structure of AChE<sub>WT</sub>.

Supplemental Data File 2. The structure of AChE<sub>MT</sub>.
